# Supplementary material for: Genome-Wide RNAi Screen in IFN-γ-Treated Human Macrophages Identifies Genes Mediating Resistance to the Intracellular Pathogen Francisella tularensis
Source: PubMed Central journal article supplement (PMC3281001; doi:10.1371/journal.pone.0031752), 2012-02-16
Supplement: pone.0031752.s003.pdf [file pone.0031752.s003.pdf]

**Table S1. 247 Genes Identified in Multiple Hits (Top 212 genes identified in multiple sorts)**

| Gene and Function                                                                                                                                         | EntrezGene ID  | #Clones | #Sorts |
|-----------------------------------------------------------------------------------------------------------------------------------------------------------|----------------|---------|--------|
| <b>SERPINI1/SERPINB7/SERPINB6/SERPINA7/SERPINB2/SERPINB4:</b> serine (or cysteine) proteinase inhibitor.                                                  | NM_001122752.1 | 8       | 4      |
| <b>TRIM10:</b> tripartite motif-containing 10 isoform 1 and 2. Seems to play an important role in erythropoiesis.                                         | NM_006778.3    | 4       | 4      |
| <b>ADAM9:</b> ADAM metalloproteinase domain 9 (meltrin gamma)                                                                                             | NM_001005845.1 | 4       | 3      |
| <b>APC:</b> adenomatous polyposis coli. Antagonist of the Wnt signaling pathway.                                                                          | NM_000038      | 5       | 3      |
| <b>CASP8:</b> caspase 8 isoform B precursor. Caspases play a central role in the execution-phase of cell apoptosis.                                       | NM_001228      | 4       | 3      |
| <b>CCL8:</b> small inducible cytokine A8 precursor. This cytokine displays chemotactic activity for monocytes, lymphocytes, basophils and eosinophils.    | NM_005623.2    | 3       | 3      |
| <b>DICER1:</b> dicer 1, ribonuclease type III; This encoded protein possessing an RNA helicase motif containing a DEXH box in its amino terminus.         | NM_177438      | 4       | 3      |
| <b>EIF2AK2:</b> eukaryotic translation initiation factor 2-alpha kinase 2.                                                                                | NM_002759.1    | 3       | 3      |
| <b>EML1:</b> echinoderm microtubule associated protein like 1.                                                                                            | NM_001008707.1 | 4       | 3      |
| <b>ENPP4:</b> ectonucleotide pyrophosphatase/phosphodiesterase 4 (putative function).                                                                     | NM_014936.4    | 5       | 3      |
| <b>FAF1:</b> Fas (TNFRSF6) associated factor 1 (UCSC); Mediates apoptosis in a number of organ systems.                                                   | NM_007051.2    | 7       | 3      |
| <b>GCSH:</b> glycine cleavage system protein H (aminomethyl carrier)                                                                                      | NM_004483.3    | 8       | 3      |
| <b>GDNF:</b> glial cell derived neurotrophic factor isoform 2.                                                                                            | NM_000514.2    | 3       | 3      |
| <b>HNRPH2:</b> heterogeneous nuclear ribonucleoprotein H2. Influence pre-mRNA processing and other aspects of mRNA metabolism and transport.              | NC_007878.1    | 5       | 3      |
| <b>ITPR1/ITPR2/ITPR3:</b> inositol 1,4,5-triphosphate receptor, type 3                                                                                    | NM_001099952.1 | 3       | 3      |
| <b>KL:</b> klotho isoform a. type-I membrane protein that is related to beta-glucosidases. Klotho-deficient mice had decreased nitric oxide production    | NM_004795.2    | 5       | 3      |
| <b>KLF11:</b> Kruppel-like factor 11. Transcription factor                                                                                                | NM_003597      | 3       | 3      |
| <b>MED6:</b> Homo sapiens RNA polymerase II transcriptional regulation mediator (Med6, S. cerevisiae, homolog of), mRNA.                                  | NM_005466      | 3       | 3      |
| <b>MLLT10:</b> myeloid/lymphoid or mixed-lineage leukemia, 10.                                                                                            | NM_001009569.1 | 3       | 3      |
| <b>NPY5R:</b> neuropeptide Y receptor Y5. Receptor for CCL2, CCL5, CCL8.                                                                                  | NM_006174      | 4       | 3      |
| <b>PDCD4:</b> programmed cell death 4 isoform 1. Gene expression is modulated by cytokines in natural killer and T cells.                                 | NM_014456.3    | 3       | 3      |
| <b>PSIP1 / SNAPC3:</b> PC4 and SFRS1 interacting protein 1 isoform 2. Transcriptional coactivator.                                                        | NM_033222      | 4       | 3      |
| <b>RECQL:</b> RecQ protein-like isoform 1. Unknown function, belongs to a DNA helicase family.                                                            | NM_002907      | 4       | 3      |
| <b>SCGB2A2:</b> secretoglobin, family 2A, member 2                                                                                                        | NM_002411      | 4       | 3      |
| <b>SEMA3G:</b> semaphorin sem2                                                                                                                            | NM_020163      | 3       | 3      |
| <b>SH2B3:</b> lymphocyte adaptor protein.                                                                                                                 | NM_005475      | 3       | 3      |
| <b>SLC11A2:</b> solute carrier family 11 (proton-coupled). The product of this gene transports divalent metals and is involved in iron absorption.        | NM_000617      | 2       | 3      |
| <b>SLC25A46/SLC25A30/SLC25A16/SLC25A13:</b> solute carrier family 25, member 46. Mitochondrial carrier protein family.                                    | NM_138773.1    | 4       | 3      |
| <b>SLC4A7/SLC4A4/SLC4A8:</b> solute carrier family 4, sodium bicarbonate                                                                                  | NM_003615      | 5       | 3      |
| <b>TCF7:</b> transcription factor 7 (T-cell specific)                                                                                                     | NM_003202.2    | 3       | 3      |
| <b>TEP1:</b> telomerase-associated protein 1, essential for the replication of chromosome termini.                                                        | NM_007110.3    | 7       | 3      |
| <b>TSHR:</b> thyroid stimulating hormone receptor.                                                                                                        | NM_000369.2    | 3       | 3      |
| <b>TTC9:</b> tetratricopeptide repeat domain 9                                                                                                            | NM_015351.1    | 3       | 3      |
| <b>ZFR:</b> zinc finger RNA binding protein.                                                                                                              | NM_016107      | 3       | 3      |
| <b>ZNF193:</b> zinc finger protein 193. May be involved in transcriptional regulation.                                                                    | NM_006299      | 4       | 3      |
| <b>ZNF228 (ZNF112):</b> zinc finger protein 228 or 112                                                                                                    | NM_00108335.1  | 4       | 3      |
| <b>ZNF638:</b> zinc finger protein 638. Binds cytidine-rich sequences in dsDNA. It is associated with packaging, transferring, or processing transcripts. | NM_014497      | 3       | 3      |
| <b>ABCC4:</b> ATP-binding cassette, sub-family C, member 4. Transports various molecules across extra- and intra-cellular membranes.                      | NM_001105515.1 | 2       | 2      |
| <b>ABCC9:</b> ATP-binding cassette, sub-family C, member 9. ABC proteins transport various molecules across extra- and intra-cellular membranes           | NM_005691.2    | 3       | 2      |
| <b>ABHD3:</b> alpha/beta hydrolase domain containing protein. Function unknown.                                                                           | NM_138340      | 2       | 2      |

| Gene and Function                                                                                                                                        | EntrezGene ID | #Clones | #Sorts |
|----------------------------------------------------------------------------------------------------------------------------------------------------------|---------------|---------|--------|
| <b>ACSL4:</b> acyl-CoA synthetase long-chain family member 4. Plays a key role in lipid biosynthesis and fatty acid degradation.                         | NM_004458.2   | 4       | 2      |
| <b>ACTR2:</b> actin-related protein 2 isoform a. Specific function unknown.                                                                              | NM_001005386  | 2       | 2      |
| <b>ADAM30:</b> ADAM metallopeptidase domain 30 preproprotein. Membrane-anchored protein related to snake venom disintegrins. Testis-specific.            | NM_021794.2   | 3       | 2      |
| <b>ADAMTS1:</b> ADAM metallopeptidase with thrombospondin type 1. Expression may be associated with various inflammatory processes.                      | NM_006988.3   | 2       | 2      |
| <b>ADD3:</b> adducin 3 (gamma) isoform a. Associated with the regulation of blood pressure.                                                              | NM_019903     | 2       | 2      |
| <b>AGPS:</b> Homo sapiens alkylglycerone phosphate synthase, mRNA.                                                                                       | NM_003659     | 2       | 2      |
| <b>AIFM1:</b> apoptosis-inducing factor, mitochondrion-associated, 1.                                                                                    | NM_145812     | 2       | 2      |
| <b>ALDH2:</b> aldehyde dehydrogenase 2 family (mitochondrial), nuclear gene encoding mitochondrial protein.                                              | NM_000690     | 3       | 2      |
| <b>ANAPC2:</b> anaphase-promoting complex subunit 2. Promotes metaphase-anaphase transition.                                                             | NM_013366     | 3       | 2      |
| <b>ANK1:</b> ankyrin 1 isoform 5. Believed to link the integral membrane proteins to the underlying spectrin-actin cytoskeleton.                         | NM_020475     | 3       | 2      |
| <b>AP2S1:</b> adaptor-related protein complex 2, sigma 1. Associated with plasma membrane                                                                | NM_004069     | 2       | 2      |
| <b>AQP4:</b> aquaporin 4 isoform a. membrane protein that functions as water-selective channels in the plasma membrane of many cells.                    | NM_001650     | 3       | 2      |
| <b>ARL4:</b> ADP-ribosylation factor-like 4                                                                                                              | NM_005738     | 2       | 2      |
| <b>ATP2B4:</b> plasma membrane calcium ATPase 4 isoform 4b. Removes bivalent calcium ions from eukaryotic cells and create calcium homeostasis.          | NM_001001396  | 2       | 2      |
| <b>ATXN3:</b> ataxin 3 isoform 2.                                                                                                                        | NM_004993     | 2       | 2      |
| <b>AZIN1:</b> ornithine decarboxylase antizyme inhibitor. Regulates cellular polyamine homeostasis.                                                      | NM_015878     | 2       | 2      |
| <b>BAIAP2:</b> BAI1-associated protein 2 isoform 1. brain-specific angiogenesis inhibitor (BAI1)-binding protein.                                        | NM_006340     | 3       | 2      |
| <b>BCHE:</b> butyrylcholinesterase.                                                                                                                      | NM_000055     | 2       | 2      |
| <b>BDNF:</b> brain-derived neurotrophic factor isoform c. Member of nerve growth factor family. Necessary for survival of striatal neurons in the brain. | NM_170735     | 2       | 2      |
| <b>BIRC3:</b> baculoviral IAP repeat-containing protein 3. Inhibits apoptosis by binding to tumor necrosis factor receptor-associated factors.           | NM_001165.3   | 2       | 2      |
| <b>BNC1:</b> basonuclein 1. zinc finger protein present in the basal cell layer of epidermis and in hair follicles.                                      | NM_001717     | 2       | 2      |
| <b>BRCA1:</b> breast cancer 1, early onset isoform 1. Maintains genomic stability and acts as a tumor suppressor.                                        | NM_007294     | 2       | 2      |
| <b>C1orf9:</b> chromosome 1 open reading frame 9 protein                                                                                                 | NM_016227     | 2       | 2      |
| <b>CACNA1D:</b> calcium channel voltage-dependent L type                                                                                                 | NM_000720     | 2       | 2      |
| <b>CALM1:</b> calmodulin 1 (phosphorylase kinase, delta). Calmodulin mediates the control of a large number of enzymes and other proteins by Ca(2+).     | NM_006888     | 7       | 2      |
| <b>CD58:</b> CD58 molecule. Lymphocyte function-associated antigen 3. Cell adhesion molecule, mediates adhesion between killer and target cells, etc.    | NM_001779     | 5       | 2      |
| <b>CDC42EP4:</b> CDC42 effector protein (Rho GTPase binding) 4.                                                                                          | NM_012121     | 2       | 2      |
| <b>CDH7:</b> cadherin 7, type 2 preproprotein. Calcium dependent cell-cell adhesion glycoprotein.                                                        | NM_033646     | 5       | 2      |
| <b>CEACAM8:</b> carcinoembryonic antigen-related cell adhesion molecule 8.                                                                               | NM_001816     | 2       | 2      |
| <b>CFTR:</b> cystic fibrosis transmembrane conductance. Chloride channel.                                                                                | NM_000492     | 3       | 2      |
| <b>CHN2:</b> beta chimerin isoform 1. GTPase-activating protein activity. Plays a role in proliferation and migration of smooth muscle cells.            | NM_004067     | 3       | 2      |
| <b>Chromosome 2 genomic contig.</b> Near here is SRY-box 11 (SRY-box is gene SOX4)                                                                       |               | 4       | 2      |
| <b>CLNS1A:</b> chloride channel, nucleotide-sensitive, 1A                                                                                                | NM_001293     | 3       | 2      |
| <b>COL8A1:</b> alpha 1 type VIII collagen precursor. Major component of the basement membrane of the corneal endothelium.                                | NM_001850     | 2       | 2      |
| <b>CRY1:</b> cryptochrome 1 (photolyase-like).                                                                                                           | NM_004075     | 3       | 2      |
| <b>CRYGD:</b> crystallin, gamma D.                                                                                                                       | NM_006891     | 2       | 2      |
| <b>CSH1:</b> chorionic somatomammotropin hormone 1 (placental actogen)                                                                                   | NM_001317     | 4       | 2      |
| <b>CSR2:</b> cysteine and glycine-rich protein 2. May be involved in regulatory processes important for development and cellular differentiation.        | NM_001321     | 2       | 2      |
| <b>CUL4B:</b> cullin 4B.                                                                                                                                 | NM_003588     | 3       | 2      |
| <b>DFNA5:</b> Homo sapiens deafness, autosomal dominant 5, mRNA.                                                                                         | NM_004403     | 3       | 2      |
| <b>DKC1:</b> dyskerin. Involved in various aspects of rRNA processing and modification.                                                                  | NM_001363     | 3       | 2      |

| Gene and Function                                                                                                                      | EntrezGene ID | #Clones | #Sorts |
|----------------------------------------------------------------------------------------------------------------------------------------|---------------|---------|--------|
| <b>DMXL2:</b> Dmx-like 2                                                                                                               | NM_015263.2   | 2       | 2      |
| <b>EBAG9:</b> estrogen receptor binding site associated. Estrogen-responsive gene.                                                     | NM_198120     | 3       | 2      |
| <b>EEF1D:</b> eukaryotic translation elongation factor 1 delta. Responsible for enzymatic delivery of aminoacyl tRNAs to the ribosome. | NM_032378     | 3       | 2      |
| <b>EGFR:</b> epidermal growth factor receptor isoform d. This protein is a receptor for members of the epidermal growth factor family. | NM_005228     | 3       | 2      |
| <b>EHMT2:</b> HLA-B associated transcript 8 isoform a. Thought to be involved in intracellular protein-protein interaction.            | NM_006709     | 2       | 2      |
| <b>ELAVL2:</b> ELAV embryonic lethal, abnormal vision.                                                                                 | NM_004432     | 2       | 2      |
| <b>EP300:</b> E1A binding protein p300. Functions as histone acetyltransferase and regulates transcription via chromatin remodeling.   | NM_001429     | 2       | 2      |
| <b>F2RL1:</b> H. sapiens coagulation factor II (thrombin) receptor-like 1                                                              | NM_005242.3   | 2       | 2      |
| <b>F7:</b> coagulation factor VII isoform b precursor. Vitamin K-dependent factor essential for hemostasis.                            | NM_001034806  | 2       | 2      |
| <b>FABP4:</b> fatty acid binding protein 4, adipocyte                                                                                  | NM_001442     | 3       | 2      |
| <b>FBXO22:</b> F-box only protein 22 isoform a.                                                                                        | NM_147188     | 2       | 2      |
| <b>FGF20:</b> fibroblast growth factor 20. Possesses broad mitogenic and cell survival activities.                                     | NM_019851     | 2       | 2      |
| <b>FGF7:</b> fibroblast growth factor 7 precursor. Growth factor active on keratinocytes.                                              | NM_002009     | 3       | 2      |
| <b>FLG:</b> filaggrin. Profilaggrin is a major protein component of the keratohyalin granules of mammalian epidermis.                  | NM_002016     | 2       | 2      |
| <b>FLRT3:</b> fibronectin leucine rich transmembrane protein 3. Function in cell adhesion and/or receptor signaling.                   | NM_013281     | 3       | 2      |
| <b>FXN:</b> frataxin isoform 1 preproprotein. Regulates mitochondrial iron transport and respiration.                                  | NM_000144     | 6       | 2      |
| <b>GAD2:</b> glutamate decarboxylase 2. Catalyzes the production of gamma-aminobutyric acid from L-glutamic acid.                      | NM_000818     | 3       | 2      |
| <b>GAS7:</b> growth-arrest-specific 7 isoform b. Expressed primarily in brain cells. Plays a role in neural development.               | NM_003644     | 4       | 2      |
| <b>GFAP:</b> glial fibrillary acidic protein. One of the major intermediate filament proteins of mature astrocytes.                    | NM_002055     | 2       | 2      |
| <b>GGH:</b> Homo sapiens gamma-glutamyl hydrolase (conjugase, foylpolypolygammaglutamyl hydrolase), mRNA.                              | NM_003878     | 2       | 2      |
| <b>GHITM:</b> growth hormone inducible transmembrane protein.                                                                          | NM_014394     | 2       | 2      |
| <b>GPX3:</b> Homo sapiens glutathione peroxidase 3 (plasma), mRNA.                                                                     | NM_002084     | 2       | 2      |
| <b>GRHPR:</b> glyoxylate reductase/hydroxypyruvate reductase. Role in metabolism.                                                      | NM_012203     | 2       | 2      |
| <b>GRM1:</b> glutamate receptor, metabotropic 1. G protein-coupled receptors, inbolbed in most aspects of normal brain function.       | NM_000838     | 3       | 2      |
| <b>HIVEP1:</b> human immunodeficiency virus type I enhancer. Bind specific DNA sequences in the promoters.                             | NM_002114     | 3       | 2      |
| <b>HLA-DRB1/DRB4:</b> MHC class II HLA-DR beta 1 or 4 chain..                                                                          | NM_002124     | 2       | 2      |
| <b>HNRPA3:</b> heterogeneous nuclear ribonucleoprotein A3                                                                              | NM_194247     | 2       | 2      |
| <b>Homo sapiens hypothetical protein FLJ22670</b>                                                                                      | NM_025144     | 2       | 2      |
| <b>Homo sapiens OKSW-cl.89 mRNA, complete cds.</b>                                                                                     |               | 2       | 2      |
| <b>HSD3B2:</b> hydroxy-delta-5-steroid dehydrogenase, 3 beta. Crucial in biosynthesis of all classes of hormonal steroids.             | NM_000198     | 2       | 2      |
| <b>HTATIP2:</b> oxidoreductase (HIV-1 TAT-interactive protein 2)                                                                       | NM_001098521  | 2       | 2      |
| <b>Hypothetical protein LOC100132444</b>                                                                                               |               | 4       | 2      |
| <b>IFNB1:</b> inerferon, beta 1, fibroblast.                                                                                           | NM_002176     | 2       | 2      |
| <b>ITGA6/ITGA5:</b> integrin alpha chain 5 or 6.                                                                                       | NM_000210     | 2       | 2      |
| <b>KATNB1:</b> katanin p80 (WD repeat containing) subunit B 1.                                                                         | NM_005886     | 3       | 2      |
| <b>KCND2:</b> potassium voltage-gated channel, Shal-related. Prominent in the repolarization phase of the action potential.            | NM_012281     | 4       | 2      |
| <b>LCP2:</b> lymphocyte cytosolic protein 2.                                                                                           | NM_005565     | 3       | 2      |
| <b>LEPR:</b> leptin receptor isoform 1. Regulates adipose-tissue mass through hypothalamic effects on satiety and energy expenditure.  | NM_002303     | 5       | 2      |
| <b>LG1:</b> leucine-rich, glioma inactivated 1.                                                                                        | NM_005097     | 2       | 2      |
| <b>LHCGR:</b> Homo sapiens luteinizing hormonechoriogonadotropin receptor, mRNA.                                                       | NM_000233     | 6       | 2      |

| Gene and Function                                                                                                                                     | EntrezGene ID | #Clones | #Sorts |
|-------------------------------------------------------------------------------------------------------------------------------------------------------|---------------|---------|--------|
| <b>LRBA:</b> LPS-responsive vesicle trafficking.                                                                                                      | NM_006726     | 3       | 2      |
| <b>LRRFIP2:</b> leucine rich repeat (in FLII) interacting. May function as activator of the canonical Wnt signaling pathway, in associate with DVL3.  | NM_006309     | 3       | 2      |
| <b>M6PRBP1:</b> mannose 6 phosphate receptor binding protein 1.                                                                                       | NM_005817     | 2       | 2      |
| <b>MAP4K4:</b> mitogen-activated protein kinase kinase kinase. Shown to specifically activate MAPK8/JNK.                                              | NM_004834     | 4       | 2      |
| <b>MBNL1/MBNL3:</b> muscleblind-like 1 or 3                                                                                                           | NM_021038,    | 2       | 2      |
|                                                                                                                                                       | NM_018388     | 2       | 2      |
| <b>MCL1:</b> myeloid cell leukemia sequence 1 isoform 2. This gene encodes an anti-apoptotic protein, which is a member of the Bcl-2 family.          | NM_021960     | 4       | 2      |
| <b>MED12:</b> mediator of RNA polymerase II transcription.                                                                                            | NM_005120     | 2       | 2      |
| <b>METTL9:</b> methyltransferase like 9 isoform 2                                                                                                     | NM_016025     | 2       | 2      |
| <b>MPZL1:</b> Homo sapiens myelin protein zero-like protein MPZL1a mRNA, complete cds.                                                                | NM_024569     | 2       | 2      |
| <b>MTDH:</b> LYRIC/3D3 (Lysine-rich CEACAM1 co-isolated protein). Metastasis adhesion protein. Potential mediator of lung metastasis.                 | NM_178812     | 4       | 2      |
| <b>MTF2:</b> metal response element binding transcription; Putative DNA binding protein                                                               | NM_007358     | 2       | 2      |
| <b>MYBPC1:</b> myosin binding protein C, slow type, isoform 4                                                                                         | NM_002465     | 2       | 2      |
| <b>NAG:</b> neuroblastoma-amplified protein                                                                                                           | NM_015909     | 2       | 2      |
| <b>NAP1L2:</b> nucleosome assembly protein 1-like 2. Interacted with chromatin to regulate neuronal cell proliferation.                               | NM_021963.2   | 3       | 2      |
| <b>NBEA:</b> neurobeachin. Binds to type II regulatory subunits of protein kinase A and anchors/targets them to the membrane                          | NM_015678     | 3       | 2      |
| <b>NCBP1:</b> nuclear cap binding protein subunit 1. Promotes high-affinity mRNA-cap binding and associates with the CTD of RNA polymerase II.        | NM_002486     | 3       | 2      |
| <b>NDUFA9:</b> NADH dehydrogenase (ubiquinone) 1 alpha subcomplex, 9                                                                                  | NM_005002     | 5       | 2      |
| <b>NFE2L1:</b> nuclear factor (erythroid-derived 2)-like 1. Involved in globin gene expression in erythrocytes.                                       | NM_003204     | 2       | 2      |
| <b>NMT2:</b> N-myristoyltransferase 2. catalyzes the reaction of N-terminal myristoylation of many signaling proteins.                                | NM_004808     | 2       | 2      |
| <b>NRP1:</b> neuropilin 1. Plays versatile roles in angiogenesis, axon guidance, cell survival, migration, and invasion.                              | NM_003873     | 2       | 2      |
| <b>NUFIP1:</b> nuclear fragile X mental retardation protein. Binds RNA                                                                                | NM_012345     | 3       | 2      |
| <b>PARVA:</b> parvin, alpha. Actin-binding proteins associated with focal contacts.                                                                   | NM_018222     | 3       | 2      |
| <b>PCDHA1:</b> protocadherin alpha 1 isoform 1 precursor. Critical role in establishment and function of specific cell-cell connections in the brain. | NM_018900     | 3       | 2      |
| <b>PCOLCE2:</b> procollagen C-endopeptidase enhancer 2                                                                                                | NM_013363     | 3       | 2      |
| <b>PDCL:</b> phosducin-like. Putative modulator of heterotrimeric G proteins.                                                                         | NM_005388     | 2       | 2      |
| <b>PDGFRA:</b> platelet-derived growth factor receptor, alpha polypeptide.                                                                            | NM_006206     | 4       | 2      |
| <b>PDHX:</b> pyruvate dehydrogenase complex, component X.                                                                                             | NM_003477     | 3       | 2      |
| <b>PDK4:</b> pyruvate dehydrogenase kianse 4. Contributes to the regulation of glucose metabolism.                                                    | NM_002612     | 3       | 2      |
| <b>PEX1:</b> peroxin 1. Encodes a member of the AAA ATPase family. This protein is cytoplasmic but often anchored to a peroxisomal membrane.          | NM_000466     | 4       | 2      |
| <b>PEX11A:</b> peroxisomal biogenesis factor 11A                                                                                                      | NM_003847.1   | 2       | 2      |
| <b>PFAAP5:</b> phosphonoformate immuno-associated protein 5.                                                                                          | NM_014887     | 2       | 2      |
| <b>PGGT1B:</b> protein geranylgeranyltransferase type I, beta subunit.                                                                                | NM_005023     | 2       | 2      |
| <b>PICALM:</b> phosphatidylinositol-binding clathrin assembly.                                                                                        | NM_007166     | 2       | 2      |
| <b>PLCB2:</b> phospholipase C, beta 2.                                                                                                                | NM_004573     | 2       | 2      |
| <b>PLS1:</b> plastin 1. family of actin-binding proteins. AKA Fimbrin,                                                                                | NM_002670     | 2       | 2      |
| <b>PLXNC1:</b> plexin C1. Receptor for vaccinia virus sempaphorin A39R and herpesvirus Sema protein.                                                  | NM_005761     | 2       | 2      |
| <b>POLQ:</b> polymerase (DNA directed), theta                                                                                                         | NM_199420     | 2       | 2      |
| <b>POU4F2:</b> Brn3b POU domain transcription factor. Observed to play impt. Roles in control of cell identity in several systems.                    | NM_004575     | 2       | 2      |
| <b>PRF1:</b> perforin 1 precursor. Key effector molecule for T-cell and natural killer-cell-mediated cytotoxicity.                                    | NM_005041     | 3       | 2      |
| <b>PTBP2:</b> polypyrimidine tract binding proten 2.                                                                                                  | NM_021190     |         |        |

| Gene and Function                                                                                                                                         | EntrezGene ID | # Clones | #Sorts |
|-----------------------------------------------------------------------------------------------------------------------------------------------------------|---------------|----------|--------|
| <b>PTPRA</b> : protein tyrosine phosphatase (PTP), receptor type, A. This PTP dephosphorylates and activates Src family tyrosine kinases.                 | NM_002836.3   | 2        | 2      |
| <b>PUM2</b> : pumilio (Drosophila) homolog 2                                                                                                              | NM_015317     | 2        | 2      |
| <b>RAB11FIP3/ RAB11FIP2</b> : rab11-family interacting protein 2 or 3. Acts as a regulator of endocytic traffic by participating in membrane delivery.    | NM_014700     | 2        | 2      |
| <b>RAPGEF2</b> : Rap guanine nucleotide exchange factor 2.                                                                                                | NM_014247     | 2        | 2      |
| <b>RARRES1</b> : retinoic acid receptor responder (tazarotene). Upregulated by tazarotene and retinoic acid receptors.                                    | NM_002888.2   | 2        | 2      |
| <b>RCC1</b> : Homo sapiens chromosome condensation 1-like, mRNA.                                                                                          | NM_001268.2   | 3        | 2      |
| <b>SYT1</b> : synaptotagmin I. May serve as Ca(2+) sensors in the process of vesicular trafficking and exocytosis.                                        | NM_005639     | 2        | 2      |
| <b>RFC5</b> : Homo sapiens, replication factor C (activator 1) 5 (36.5kD), clone MGC:1155, mRNA, complete cds.                                            | NM_007370     | 2        | 2      |
| <b>RGS10</b> : regulator of G-protein signaling 10. Act as GTPase activating proteins for G alpha subunits of heterotrimeric G proteins.                  | NM_002925     | 2        | 2      |
| <b>RPL31</b> : RPL31 protein. This protein belongs to the L31E family of ribosomal proteins, located in the cytoplasm.                                    | NM_001098577  | 2        | 2      |
| <b>RYBP</b> : YEAF1 mRNA for YY1 and E4TF1 associated factor 1                                                                                            | NM_012234     | 3        | 2      |
| <b>SCAMP1</b> : secretory carrier membrane protein 1. Carriers to the cell surface in post-golgi recycling pathways.                                      | NM_004866     | 4        | 2      |
| <b>SCN3B</b> : sodium channel, voltage-gated, type III, beta                                                                                              | NM_018400     | 2        | 2      |
| <b>SCN4A</b> : voltage-gated sodium channel type 4 alpha. Responsible for the generation and propagation of action potentials in neurons and muscle.      | NM_000334     | 3        | 2      |
| <b>SEC24D</b> : Sec24-related protein D. Involved in vesicle trafficking.                                                                                 | NM_014822.2   | 2        | 2      |
| <b>SEC63</b> : SEC63 homolog (S. cerevisiae). Central component of the protein translocation apparatus of the ER membrane.                                | NM_007214     | 4        | 2      |
| <b>SFRP1</b> : secreted frizzled-related protein 1. Soluble modulator of Wnt signaling.                                                                   | NM_003012     | 2        | 2      |
| <b>SFRS5</b> : splicing factor, arginine/serine rich 5. Plays a role in constitutive splicing and can modulate the selection of alternative splice sites. | NM_001039465  | 2        | 2      |
| <b>SH3BP5</b> : SH3-domain binding protein 5 (BTK-associated)                                                                                             | NM_004844     | 2        | 2      |
| <b>SHC4</b> : rai-like protein / <b>EID1</b> : CREBBP/EP300 inhibitor 1.                                                                                  | NM_203349     | 2        | 2      |
| <b>SIRT4</b> : sirtuin 4. unknown function                                                                                                                | NM_012240     | 2        | 2      |
| <b>SLC19A3</b> : solute carrier family 19, member 3. Part of reduced folate family of micronutrient transporter genes.                                    | NM_025243     | 2        | 2      |
| <b>SLC26A4</b> : pendrin. Sodium-independent transporter of chloride and iodide.                                                                          | NM_000441     | 2        | 2      |
| <b>SSX3</b> : synovial sarcoma, X breakpoint 3 isoform a. May function as transcriptional repressors.                                                     | NM_021014     | 3        | 2      |
| <b>STRN3</b> : nuclear autoantigen. Binds calmodulin in a calcium dependent manner. May function as scaffolding or signaling protein.                     | NM_014574     | 4        | 2      |
| <b>STX3</b> : syntaxin 3. Potentially involved in docking of synaptic vesicles at presynaptic active zones.                                               | NM_004177     | 2        | 2      |
| <b>STXBP5L</b> : syntaxin-binding protein 5-like (Tomosyn-2). May play a role in vesicle trafficking and exocytosis.                                      | NM_014980     | 2        | 2      |
| <b>SULT1C2</b> : sulfotransferase family, cytosolic, 1C, member 2. Catalyzes the sulfate conjugation of many drugs, hormones and neurotransmitters.       | NM_001056.3   | 8        | 2      |
| <b>SYNC1</b> : Syncoilin, intermediate filament 1                                                                                                         | NM_030786     | 4        | 2      |
| <b>TAOK1</b> : TAO kinase 1. Phosphorylates MKK3 (by similarity). Activates the p38 MAP kinase pathway.                                                   | NM_020791     | 9        | 2      |
| <b>TBL1X</b> : transducin beta-like 1X. Plays an essential role in transcription activation mediated by nuclear receptors.                                | NM_005647     | 2        | 2      |
| <b>TBX4</b> : T-box. Involved in the transcriptional regulation of genes required for mesoderm differentiation.                                           | NM_018488     | 2        | 2      |
| <b>TFPI2</b> : tissue factor pathway inhibitor 2.                                                                                                         | NM_006528     | 2        | 2      |
| <b>TFRC</b> : transferrin receptor                                                                                                                        | NM_003234     | 2        | 2      |
| <b>TGOLN2</b> : trans-golgi network protein 2.                                                                                                            | NM_006464     | 4        | 2      |
| <b>THRB</b> : thyroid hormone receptor, beta (erythroblastic leukemia viral oncogene homolog 2, avian)                                                    | NM_000461     | 2        | 2      |
| <b>TIA1</b> : TIA1 protein isoform 1. Member of RNA-binding protein family and possesses nucleolytic activity.                                            | NM_022037     | 2        | 2      |
| <b>TLL2</b> : tolloid-like 2. Member of metzincin family.                                                                                                 | NM_012465     | 4        | 2      |
| <b>TM2D2</b> : TM2 domain containing 2 isoform b. May have a regulatory roles in cell death or proliferation signal cascades.                             | NM_031940     | 2        | 2      |
| <b>TNFRSF9</b> : tumor necrosis factor receptor superfamily 9. The receptor contributes to the clonal expansion, survival, and development of T cells.    | NM_001561     | 2        | 2      |

| Gene and Function                                                                                                                                | EntrezGene ID | #Clones | #Sorts |
|--------------------------------------------------------------------------------------------------------------------------------------------------|---------------|---------|--------|
| <b>RIB3</b> : tribbles 3, protein kinase domains containing protein similar to phosphoprotein C8FW (LOC57761), mRNA.                             | NM_021158     | 3       | 2      |
| <b>TRIM49</b> : ring finger protein 18.                                                                                                          | NM_020358     | 4       | 2      |
| <b>TRPA1</b> : transient receptor potential cation channel, ankyrin-like protein 1. May function in signal transduction and growth control.      | NM_007332     | 3       | 2      |
| <b>TUBB1/TUBB2C/TUBB6</b> : Tubulin, beta, class VI (1)/beta 2 (2C)/beta 6 (6)                                                                   | NM_030773     | 8       | 2      |
| <b>UBLCP1</b> : ubiquitin-like domain containing CTD phosphatase.                                                                                | NM_145049     | 2       | 2      |
| <b>UBXD2</b> : integral membrane protein of the ER that binds valosin-containing protein and promotes ER-associated protein degradation.         | NM_014607     | 2       | 2      |
| <b>UGT2B17</b> : Human UDP glucuronosyltransferase mRNA, partial cds.                                                                            | NM_001077     | 4       | 2      |
| <b>WIF1</b> : WNT inhibitory factor 1 precursor. Binds WNT proteins and inhibits their activities (control of embryonic development).            | NM_007191     | 2       | 2      |
| <b>ZNF263</b> : zinc finger protein 263                                                                                                          | NM_005741     | 2       | 2      |
| <b>ZNF639</b> : zinc finger protein 639                                                                                                          | NM_016331     | 2       | 2      |
| <b>ABHD2</b> : alpha/beta hydrolase domain containing protein. Function unknown.                                                                 | NM_152924     | 1       | 1      |
| <b>ADD2</b> : H. sapiens adducin 2 (beta) , transcript variant beta-4, mRNA.                                                                     | NM_001617     | 2       | 1      |
| <b>ATP6V1D</b> : H+ transporting two-sector ATPase. mediates acidification of intracellular organelles                                           | NM_015994     | 2       | 1      |
| <b>BAG4</b> : BCL2-associated athanogene 4. Inhibits the chaperone activity of HSP70/HSC70 by promoting substrate release.                       | NM_004874     | 2       | 1      |
| <b>CACNA1S</b> : calcium channel, voltage-dependent, L type. Slowly activating, skeletal muscle.                                                 | NM_000069     | 2       | 1      |
| <b>CSNK1G2</b> : casein kinase 1, gamma 2                                                                                                        | NM_001319     | 2       | 1      |
| <b>CYP1B1</b> : cytochrome P450, family 1. Cytochromes P450 are a group of heme-thiolate monooxygenases.                                         | NM_000104     | 2       | 1      |
| <b>CYP3A43</b> : cytochrome P450, family 3, subfamily A, polypeptide 43.                                                                         | NM_057095     | 2       | 1      |
| <b>DDX18</b> : DEAD (Asp-Glu-Ala-Asp) box polypeptide 18.                                                                                        | NM_006773     | 2       | 1      |
| <b>DMXL1</b> : Dmx-like 1. Unknown function.                                                                                                     | NM_005509     | 3       | 1      |
| <b>DUSP1</b> : dual specificity phosphatase 1. Expression is induced in human skin fibroblasts by oxidative/heat stress and growth factors.      | NM_004417     | 2       | 1      |
| <b>EIF4G2</b> : eukaryotic translation initiation factor 4 gamma, 2                                                                              | NM_002759     | 2       | 1      |
| <b>EMP1</b> : epithelial membrane protein 1.                                                                                                     | NM_001423     | 2       | 1      |
| <b>GABRA2</b> : gamma-aminobutyric acid A receptor, alpha 2.                                                                                     | NM_000807.2   | 2       | 1      |
| <b>GALNT2</b> : polypeptide N-acetylgalactosaminyltransferase 2.                                                                                 | NM_004481     | 1       | 1      |
| <b>GNG13</b> : guanine nucleotide binding protein (G protein). Involved as a modulator or transducer in various transmembrane signaling systems. | NM_016541     | 3       | 1      |
| <b>GSTM2</b> : Homo sapiens glutathione S-transferase M2 (muscle), mRNA.                                                                         | NM_000848     | 2       | 1      |
| <b>HIST1H1D</b> : histone cluster 1, h1d                                                                                                         | NM_005320     | 3       | 1      |
| <b>HNRPK</b> : heterogeneous nuclear ribonucleoprotein K. pre-mRNA processing. Cell cycle progression                                            | NM_031262     | 2       | 1      |
| <b>IDH1</b> : Homo sapiens isocitrate dehydrogenase 1 (NADP+), soluble, mRNA.                                                                    | NM_005896     | 2       | 1      |
| <b>KIF4A</b> : kinesin family member 4. Involved in many crucial cellular processes, including cell division.                                    | NM_012310     | 3       | 1      |
| <b>OR5I1</b> : olfactor receptor, family 5, subfamily I. Initiate a neuronal response that triggers the perception of smell.                     | NM_006637     | 3       | 1      |
| <b>OTUD4</b> : OTU domain containing 4 protein isoform 2.                                                                                        | NM_017493     | 2       | 1      |
| <b>PEX12</b> : peroxisomal biogenesis factor 12. Required for protein import into peroxisomes.                                                   | NM_000286     | 2       | 1      |
| <b>PPP2R1B</b> : beta isoform of regulatory subunit A, protein phosphatase 2. Implicated in the negative control of cell growth and division.    | NM_002716     | 2       | 1      |
| <b>PTPRF/PPFIA1</b> : The protein encoded by this gene is a member of the LAR protein-tyrosine phosphatase-interacting protein (liprin) family   | NM_002840     | 3       | 1      |
| <b>RAB31</b> : RAB31, member RAS oncogene family.                                                                                                | NM_006868     | 2       | 1      |
| <b>REL</b> : v-rel reticuloendotheliosis viral oncogene, a transcription factor that is a member of the Rel/NFKB family,                         | NM_002908     | 2       | 1      |
| <b>RFC4</b> : Homo sapiens replication factor C (activator 1) 4 (37kD), mRNA.                                                                    | NM_002916     | 2       | 1      |
| <b>SCARB1</b> : scavenger receptor class B, member 1 isoform 1.                                                                                  | NM_005505     | 2       | 1      |

| Gene and Function                                                                                                                                       | EntrezGene ID | #Clones | #Sorts |
|---------------------------------------------------------------------------------------------------------------------------------------------------------|---------------|---------|--------|
| <b>SIRT1:</b> sirtuin 1. Functions in humans unknown, in yeast they regulate epigenetic gene silencing and suppress recombination of rDNA.              | NM_012238     | 3       | 1      |
| <b>SLC2A6:</b> solute carrier family 2 (facilitated glucose transporter), member 6.                                                                     | NM_017585     | 2       | 1      |
| <b>TNFRSF6B:</b> tumor necrosis factor receptor superfamily, member 6b. Plays a regulatory role in suppressing FasL- and LIGHT-mediated cell death.     | NM_032945     | 5       | 1      |
| <b>UBE2E3:</b> ubiquitin-conjugating enzyme E2E 3. Involved in targeting abnormal or short-lived proteins for degradation.                              | NM_006357     | 3       | 1      |
| <b>UPK1A:</b> uroplakin 1A; Mediate signal transduction events that play a role in the regulation of cell development, activation, growth and motility. | NM_007000     | 3       | 1      |
